# Supplementary material
Source: PubMed Central journal article supplement (PMC6677593)
Supplement: NIHMS1530198-supplement-1.pdf [file NIHMS1530198-supplement-1.pdf]

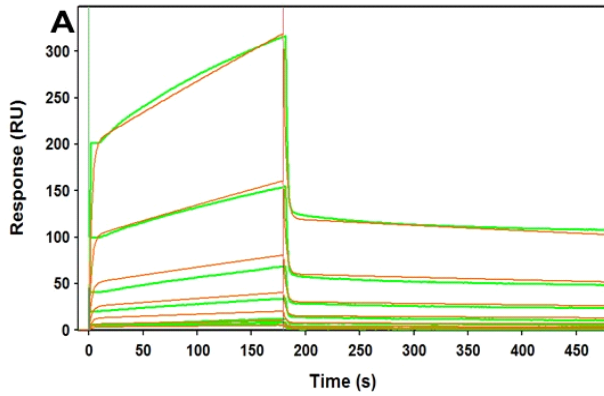

The final kinetic parameters are:

| $K_{on}$                            | $k_{off}$                           | $R_{max}$       | $K_D$           | Res sd |
|-------------------------------------|-------------------------------------|-----------------|-----------------|--------|
| $8.0 \text{ M}^{-1} \text{ s}^{-1}$ | $5.2 \times 10^{-4} \text{ s}^{-1}$ | $5 \times 10^3$ | $7 \mu\text{M}$ | 5.80   |

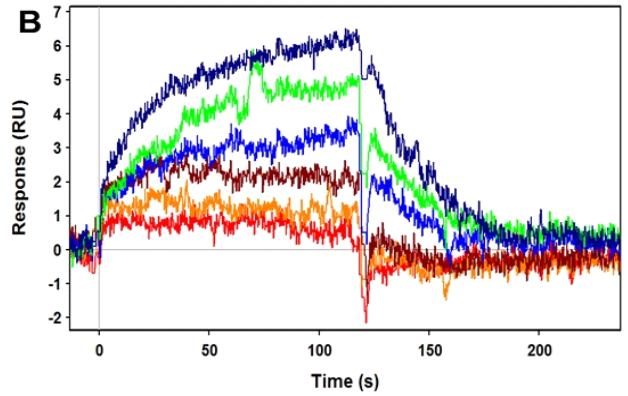

The final kinetic parameters are:

| $K_{on}$                                         | $k_{off}$                            | $R_{max}$ | $K_D$            | Res sd |
|--------------------------------------------------|--------------------------------------|-----------|------------------|--------|
| $3.10 \times 10^2 \text{ M}^{-1} \text{ s}^{-1}$ | $2.48 \times 10^{-2} \text{ s}^{-1}$ | 12.0      | $81 \mu\text{M}$ | 0.45   |

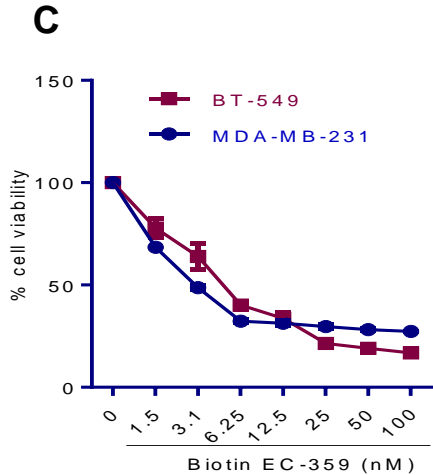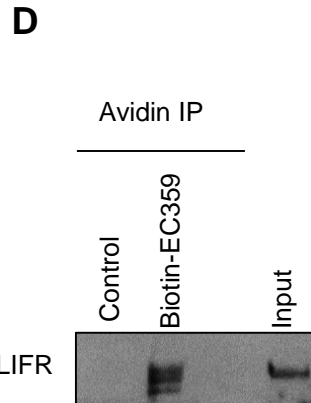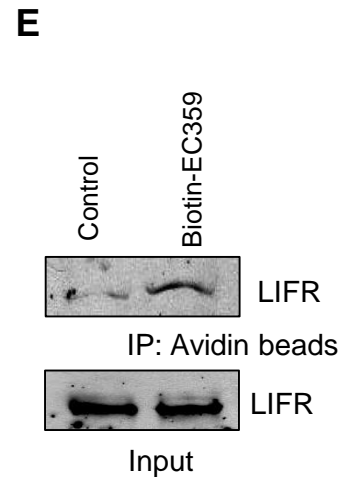

**Supplementary Figure S1.** SPR studies. **A**, Confirmation of functionality of LIF/LIFR interaction. **B**, Confirmation of LIFR-EC359 interaction. **C**, Activity of biotin-EC359 on cell viability was analyzed by MTT assay (n=3). Purified LIFR protein (**D**) or BT-549 total cellular lysate (**E**) was incubated with or without biotin-EC359. EC359 interaction with LIFR was confirmed by avidin IP followed by western blot analysis.

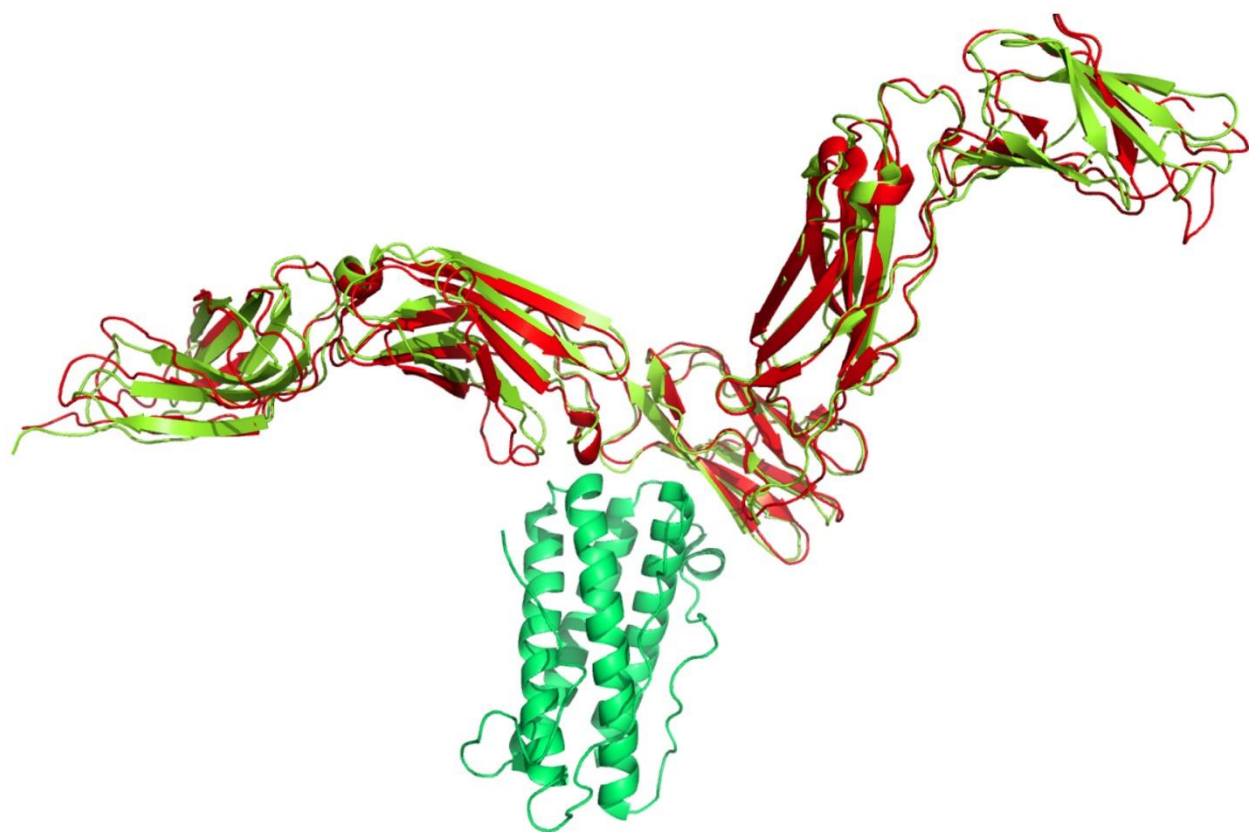

**Supplementary Figure S2.** Superimposition of hLIFR (pale green) onto the mLIFR (red)-hLIF (green) complex.



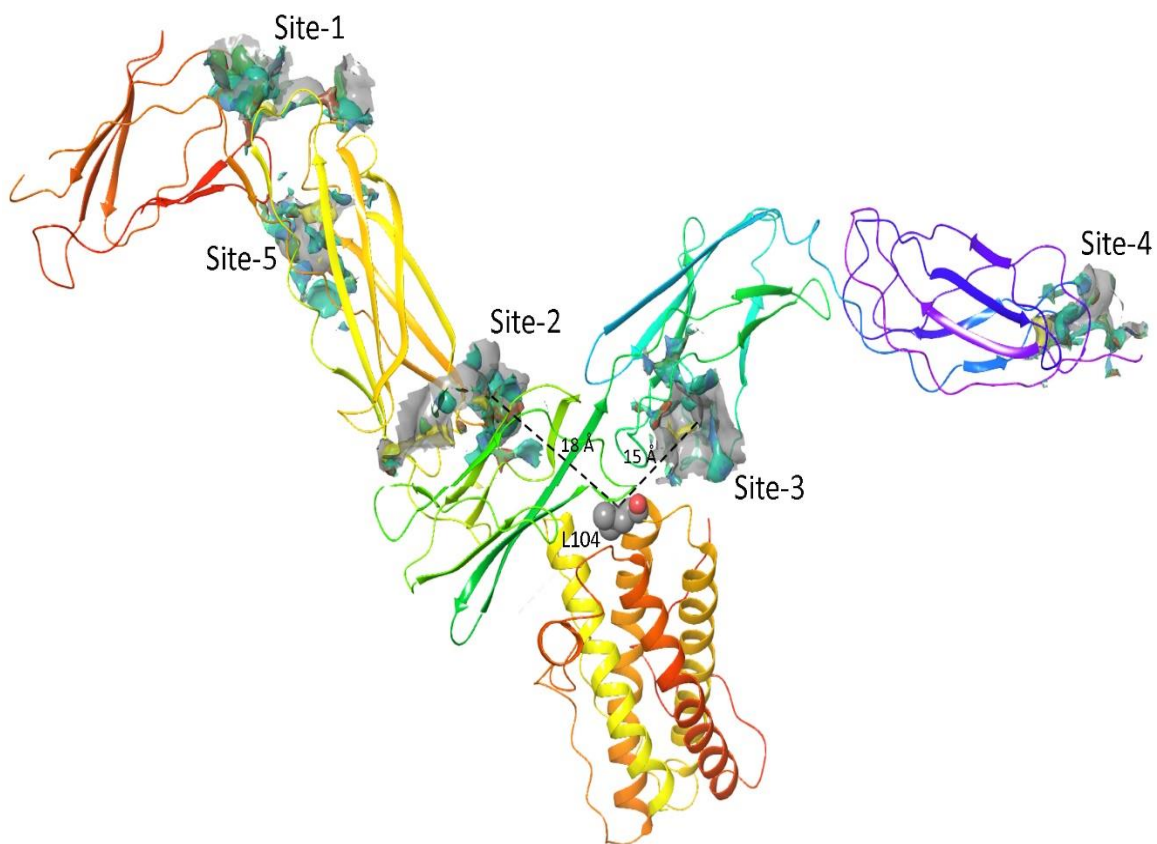

**Supplementary Figure S4.** Five prominent sites identified through sitemap program Schrödinger. The distances from L104 to site 2 and 3 were represented in dashed lines.

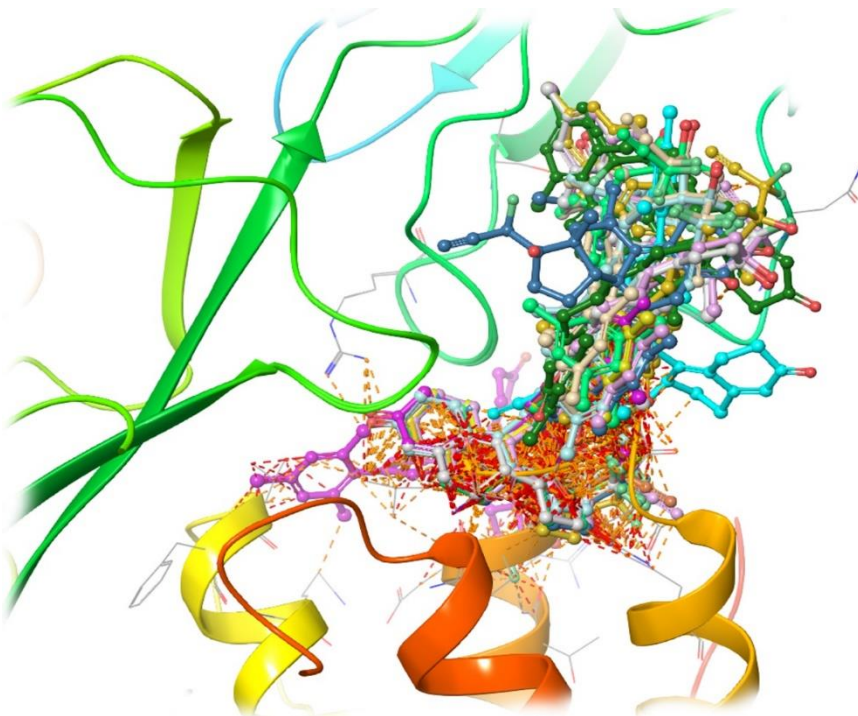

**Supplementary Figure S5.** Binding poses of EC359 at Site-3. Majority of the ligand poses are making steric clashes with hLIF (represented in orange color).

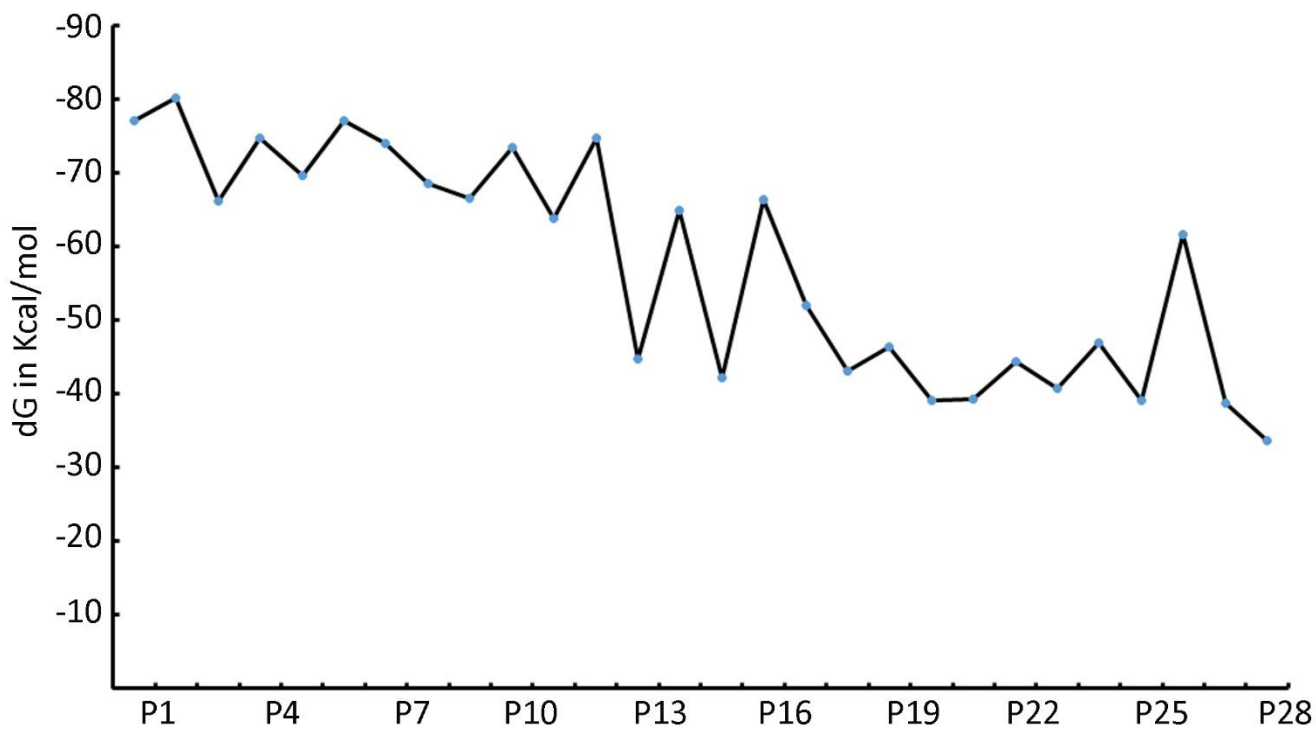

**Supplementary Figure S6.** MM-GBSA scores (represented in kcal/mol) for different poses obtained from the IFD

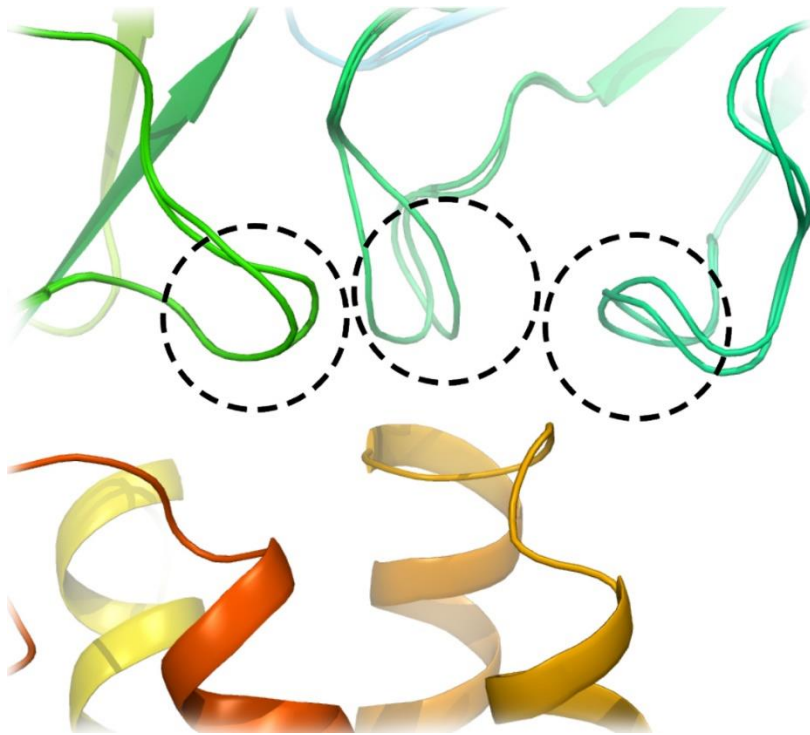

**Supplementary FigureS 7.** Ligand induced conformational changes (marked with circles) in the best scored pose. A majority of the changes occurred to the loops at the LIF binding region.

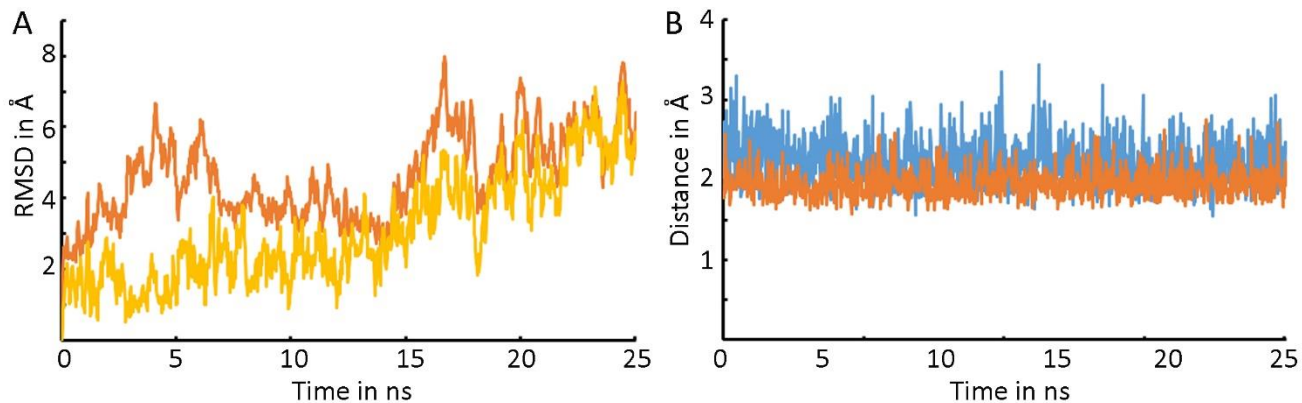

**Supplementary Figure S8.** A: the RMSD of protein (represented in orange color) and ligand (represented in yellow color). B: The distance of hydrogen bonds with T308 (represented in orange color) and T316 (represented in blue color).



| Compound | Assays                                                                                                                                             | Result                                                                                                                                               |
|----------|----------------------------------------------------------------------------------------------------------------------------------------------------|------------------------------------------------------------------------------------------------------------------------------------------------------|
| EC359    | Mutagenicity testing- <i>S. typhimurium</i> TA98, TA100, TA1535 and <i>E.coli</i> WP2 uvrA + <i>E. coli</i> WP2[pKM101] strains                    | No mutagenicity                                                                                                                                      |
| EC359    | Cardiotoxicity assessment (hERG): EC359 against hERG membrane using a fluorescence polarization assay                                              | No liability                                                                                                                                         |
| EC359    | CYP inhibition: In vitro assessment of Cytochrome P450 Inhibition potential for EC359 using human liver microsomes (1A2, 2C9, 2C19, 2D6, 3A4)      | 2D6 inhibition                                                                                                                                       |
| EC359    | Hepatocyte stability: In vitro evaluation of EC359 compound for metabolic stability using cryopreserved human, mouse, rat and dog hepatocytes      | Human & Mouse-moderate<br>Rat & Dog - low                                                                                                            |
| EC359    | Microsomal stability: In vitro evaluation of EC359 compound for metabolic stability using cryopreserved human, mouse, rat and dog liver microsomes | Human & Mouse-moderate<br>Rat & Dog- low                                                                                                             |
| EC359    | Single dose MTD: 10, 25, 50 and 100mg/kg                                                                                                           | No toxicity observed                                                                                                                                 |
| EC359    | PK study in Rat & Mouse                                                                                                                            | Orally bioavailable; Mouse PK: 3.87 (iv); 1.0h (p.o) Rat PK:6h (iv); 3.0 (p.o)                                                                       |
| EC359    | Plasma protein binding (%)                                                                                                                         | Human- 99.98; Mouse- 99.63; Rat- 99.89; Dog- 99.83                                                                                                   |
| EC359    | Plasma stability (% remaining at 60 min)                                                                                                           | Human-113.92; Mouse- 104.91; Rat- 108.64; Dog- 105.61                                                                                                |
| EC359    | Solubility: pION, kinetic, thermodynamic                                                                                                           | Low <10 µg/mL                                                                                                                                        |
| EC359    | Metabolite identification                                                                                                                          | Major metabolic pathway- Phase I metabolism; No glucuronide metabolites as evidenced by low CL in UDPGA                                              |
| EC359    | Caco2 –permeability & efflux transporter substrate activity                                                                                        | Low permeable; No efflux transporter substrate activity                                                                                              |
| EC359    | Off-target binding study (CEREP screen)                                                                                                            | GR and hERG were identified as off targets, however, IC 50 of binding with these receptors - up to 10uM and 30uM no GR and hERG binding respectively |
| EC359    | LIF and LIFR binding – Thermophoresis method                                                                                                       | Kd LIFR- 10.2nM; Kd LIF- No binding up to 5microM                                                                                                    |

**Supplementary Figure S9.** Pharmacological features of EC359

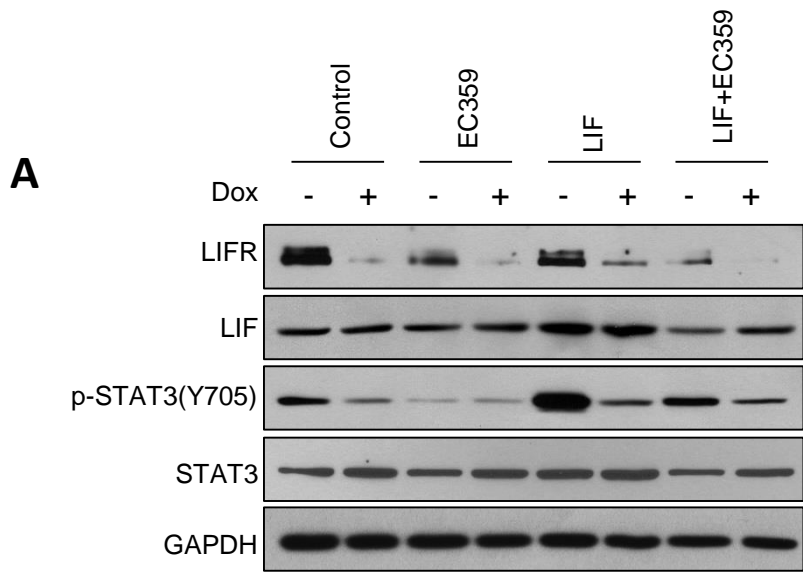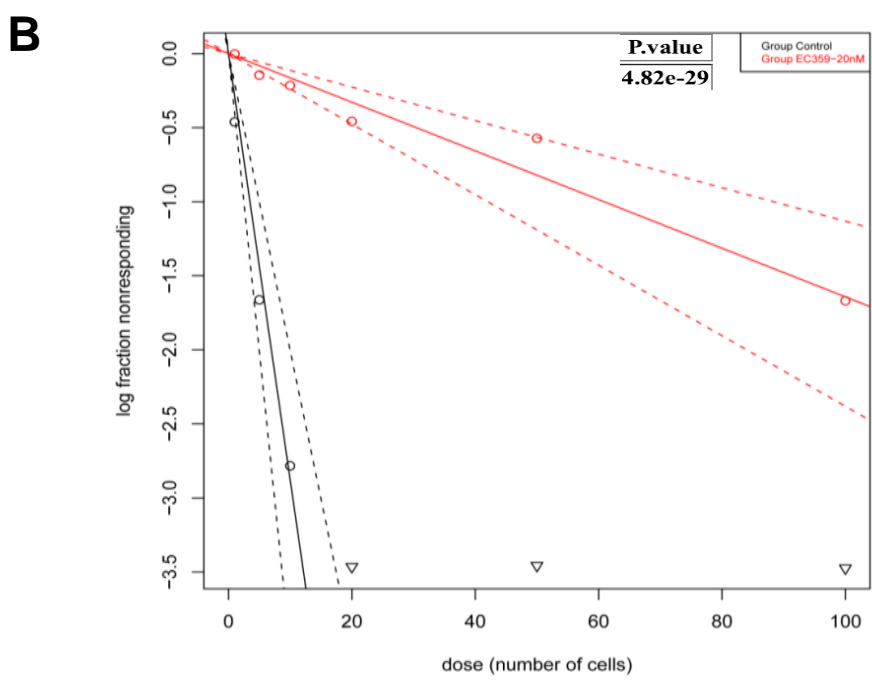

Confidence intervals for 1/(stem cell frequency)

| Group      | Lower | Estimate | Upper |
|------------|-------|----------|-------|
| Control    | 4.99  | 3.47     | 2.49  |
| EC359-20nM | 88.35 | 60.88    | 41.99 |

**Supplementary Figure S10. A.** Effect of dox inducible CRISPR/Cas9 mediated KO of LIFR on STAT3 signaling in the presence or absence of LIF in control or EC359 treated cells was measured using western blot analysis. GAPDH was used as a loading control. **B.** Effect of EC359 on self-renewal of cancer stem cells was determined by extreme limiting dilution assays.

**Supplementary Table S1:** Primer sequences used for RT-qPCR analysis

| Gene name | Forward Primer (5'-3')   | Reverse Primer (5'-3')    |
|-----------|--------------------------|---------------------------|
| STAT1     | ATCAGGCTCAGTCGGGGAATA    | TGGTCTCGTGTCTCTGTTCT      |
| BCL2      | GGTGGGGTCATGTGTGTGG      | CGGTTCAGGTACTIONCAGTCATCC |
| SOX2      | TGCGAGCGCTGCACAT         | TCATGAGCGTCTTGTTTTCC      |
| CCND1     | GCTGCGAAGTGGAACCATC      | CCTCCTTCTGCACACATTTGAA    |
| C-MYC     | GGCTCCTGGCAAAGGTCA       | CTGCGTAGTTGTGCTGATGT      |
| JUNB      | ACGACTCATAACAGCTACGG     | GCTCGGTTTCAGGAGTTTGTAGT   |
| TIMP1     | CTTCTGCAATCCGACCTCGT     | ACGCTGGTATAAGGTGGTCTG     |
| PTGS2     | CTGGCGCTCAGCCATACAG      | CGCACTTATACTGGTCAAATCCC   |
| SOCS2     | TTAAAAGAGGCACCAGAAGGAAC  | AGTCGATCAGATGAACCACACT    |
| BCL3      | AACCTGCCTACACCCCTATAC    | CACCACAGCAATATGGAGAGG     |
| HIF1A     | CACCACAGGACAGTACAGGAT    | CGTGCTGAATAATACCACTCACA   |
| MCL-1     | GTAATAACACCAGTACGGACGG   | CCACAAACCCATCCTTGGAAG     |
| ICAM-1    | ATGCCAGACATCTGTGTCC      | GGGGTCTCTATGCCCAACAA      |
| NANOG     | ACAACCTGGCCGAAGAATAGCA   | GGTCCCAGTCGGGTTTAC        |
| PIM1      | GAGAAGGACCGGATTTCCGAC    | CAGTCCAGGAGCCTAATGACG     |
| LCN2      | GACAACCAATCCAGGGGAAG     | GCATACATCTTTTTCGGGTCT     |
| AKT1      | AGCGACGTGGCTATTGTGAAG    | GCCATCATTCTTGAGGAGGAAGT   |
| TGFB1     | CAATTCCTGGCGATACCTCAG    | GCACAACCTCCGGTGACATCAA    |
| ZEB1      | TTCAAACCCATAGTGGTTGCT    | TGGGAGATACCAAACCAACTG     |
| TNFRSF1A  | TCACCGCTTCAGAAAACCACC    | GGTCCACTGTGCAAGAAGAGA     |
| FASL      | ATTTAACAGGCAAGTCCAACCTCA | GGCCACCCTTCTTATACTTCACT   |
| GBP1      | AGGAGTTCCTTCAAAGATGTGGA  | GCAACTGGACCCTGTCGTT       |
| PEG10     | GAGCACCAGGGATTTCTCAGT    | GGTAGTTGTGCATCAGGTAGTG    |
| BOC       | ACGGCGTGGAGAGGAATGA      | GAGGGACCTCGTTCAAGTCAG     |
| MYOGENIN  | GGGGAAAACCTACCTGCCTGTC   | AGGCGCTCGATGACTGGAT       |
